# Supplementary material for: IRF-8 regulates expansion of myeloid-derived suppressor cells and Foxp3+ regulatory T cells and modulates Th2 immune responses to gastrointestinal nematode infection
Source: PubMed Central journal article supplement (PMC5638610; doi:10.1371/journal.ppat.1006647), 2017-10-02

**S1 Fig. *Irf8* expression in MLN and spleen of naïve and Hpb-infected C57BL/6 (B6) mice.** *Irf8* expression was determined by qRT-PCR in the MLN and spleen of naïve and infected B6 mice on day 7 p.i. Each point represents an individual mouse. Data are presented as relative quantity of *Irf8* normalized against the endogenous control *Actb*. Data are presented as mean  $\pm$  SEM.

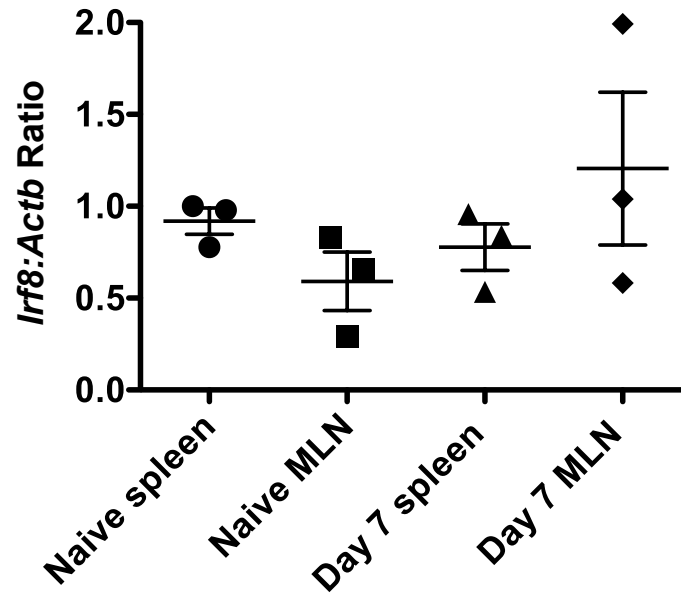

Supplement: ppat.1006647.s001.pdf [file ppat.1006647.s001.pdf]
