# Supplementary material for: IRF-8 regulates expansion of myeloid-derived suppressor cells and Foxp3+ regulatory T cells and modulates Th2 immune responses to gastrointestinal nematode infection
Source: PubMed Central journal article supplement (PMC5638610; doi:10.1371/journal.ppat.1006647), 2017-10-02

**S3 Fig. Total F4/80<sup>+</sup>CD11b<sup>hi</sup>Gr1<sup>hi</sup> cells in naïve C57BL/6 (B6) and IRF-8 deficient mice and immunophenotype and IL-4 secretion by MLN cells from Hpb-infected B6 and BXH-2 mice.** Total numbers of F4/80<sup>+</sup>CD11b<sup>hi</sup>Gr1<sup>hi</sup> cells (MDSC) in MLN and spleen of naïve (A) C57BL/6 and *Irf8*<sup>-/-</sup> and (B) C57BL/6 and BXH-2 mice. (C) Total numbers of CD4<sup>+</sup>GATA3<sup>+</sup> T cells and (D) F4/80<sup>+</sup>CD11b<sup>+</sup>CD206<sup>+</sup> cells (AAMØ) in MLN of infected C57BL/6 and BXH-2 mice on day 14 p.i. (E) AWH-induced IL-4 secretion ex vivo by MLN cells from Hpb-infected C57BL/6 and BXH-2 mice on day 14 p.i. The cells were stimulated with medium or 50 µg AWH, the supernatants were collected 48 h later, and IL-4 levels were determined by ELISA. Data are representative of three replicate experiments for C57BL/6 and *Irf8*<sup>-/-</sup> mice and two replicate experiments for C57BL/6 and BXH-2 mice (n = 5 mice per group). Data are presented as mean ± SEM. ND, not detectable; ns, not significant; \*\*, p≤0.01, \*\*\*, p≤0.001; \*\*\*\*, p≤0.0001.

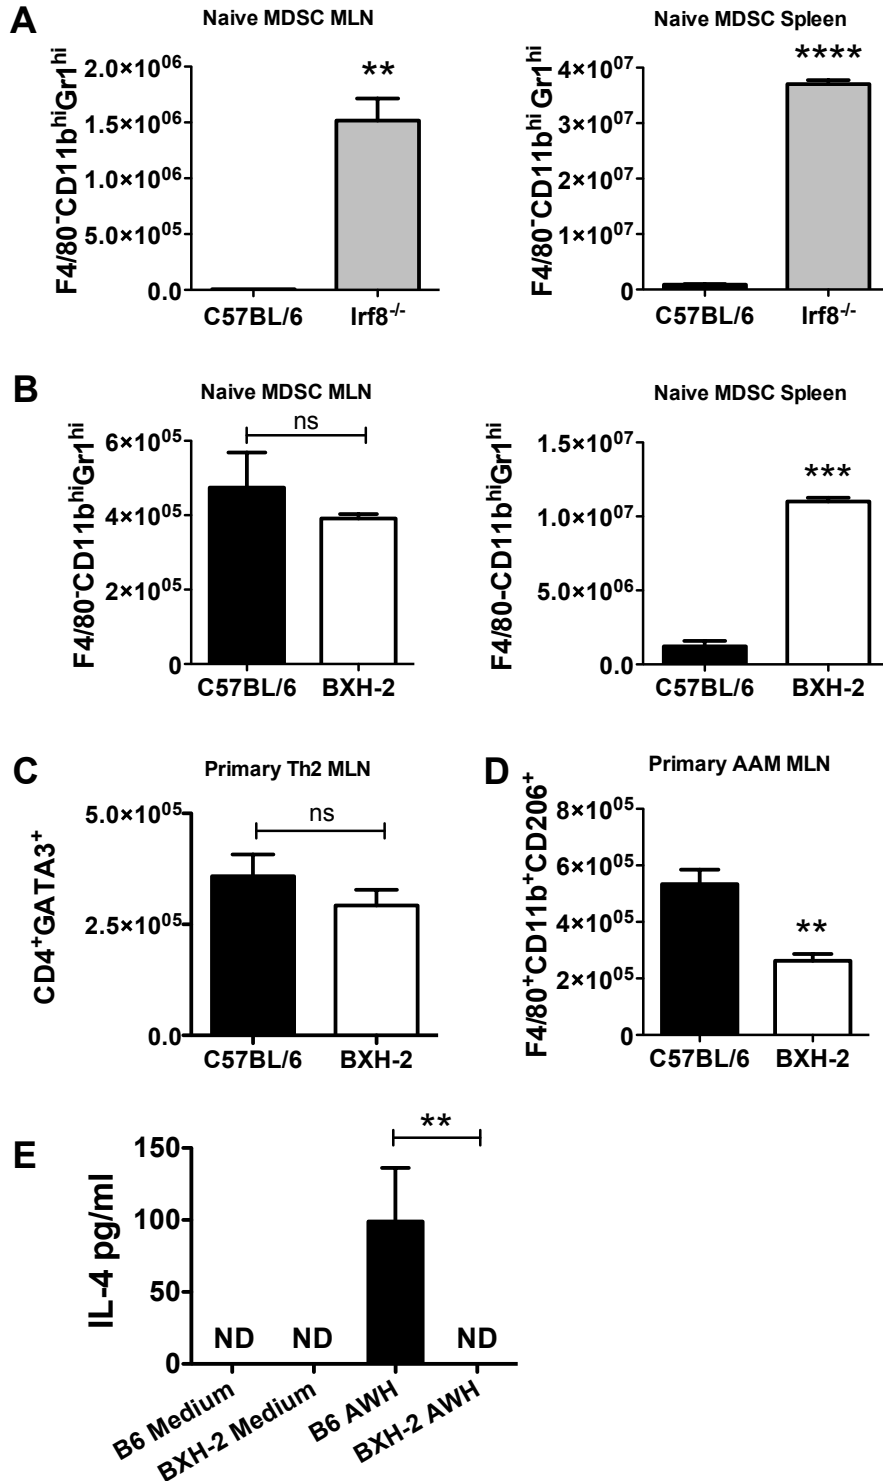

Supplement: ppat.1006647.s003.pdf [file ppat.1006647.s003.pdf]
