# Supplementary material for: IRF-8 regulates expansion of myeloid-derived suppressor cells and Foxp3+ regulatory T cells and modulates Th2 immune responses to gastrointestinal nematode infection
Source: PubMed Central journal article supplement (PMC5638610; doi:10.1371/journal.ppat.1006647), 2017-10-02

**S4 Fig. Frequencies of MDSC in MLN of naïve and Hpb-infected C57BL/6 (B6) or IRF-8 deficient mice.** The frequencies of F4/80<sup>-</sup>CD11b<sup>hi</sup>Gr1<sup>hi</sup> cells (MDSC) were determined in MLN of naïve and Hpb-infected B6, *Irf8*<sup>-/-</sup> and BXH-2 mice on day 14 p.i. by flow cytometry using the gating strategy shown in Fig 2A. Data are representative of three replicate experiments for B6 and *Irf8*<sup>-/-</sup> mice and two replicate experiments for BXH-2 mice (n=5 mice per group). Data are presented as mean ± SEM. \*, p≤0.05; \*\*, p≤0.01; \*\*\*, p≤0.001 compared to naïve B6 mice; #####, p≤0.0001 compared to naïve *Irf8*<sup>-/-</sup> mice; ns, not significant compared to naïve BXH-2 mice.

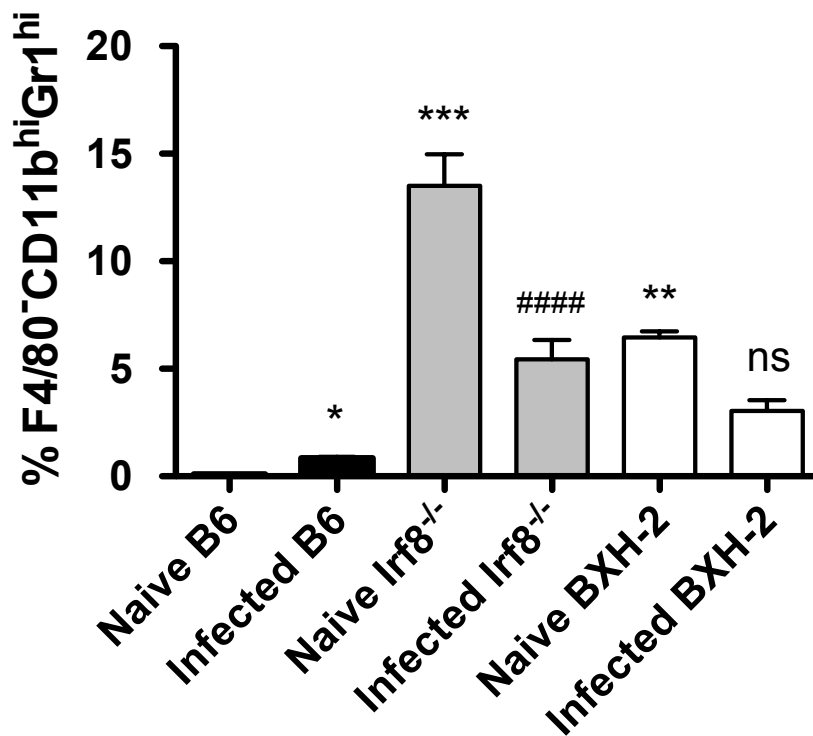

Supplement: ppat.1006647.s004.pdf [file ppat.1006647.s004.pdf]
