# Supplementary material for: IRF-8 regulates expansion of myeloid-derived suppressor cells and Foxp3+ regulatory T cells and modulates Th2 immune responses to gastrointestinal nematode infection
Source: PubMed Central journal article supplement (PMC5638610; doi:10.1371/journal.ppat.1006647), 2017-10-02

**S5 Fig. CD4<sup>+</sup> T cell proliferation is suppressed by splenic CD11b<sup>+</sup>Gr1<sup>+</sup> cells from naïve or Hpb-infected C57BL/6 and *Irf8*<sup>-/-</sup> mice.** CD11b<sup>+</sup>Gr1<sup>+</sup> cells purified from the spleen of naïve or Hpb-infected mice on day 7 p.i. were co-cultured with CFSE-labeled spleen cells from naïve C57BL/6 mice at a ratio of 1:8 (MDSC:responder cells). The cultures were stimulated with 2 µg/ml Con A and 72 h later, CFSE dilution was analyzed in gated CD4<sup>+</sup> T cells by flow cytometry. Positive and negative controls are shown in Fig 4D.

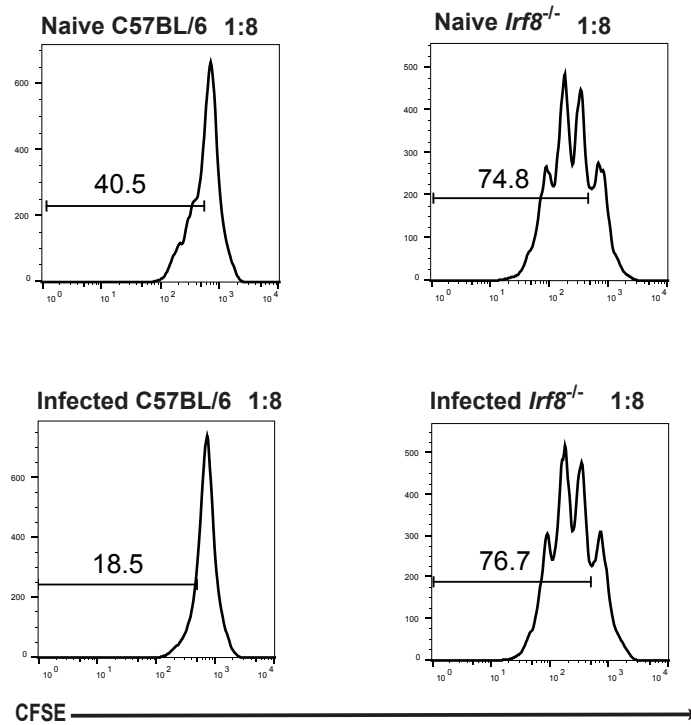

Supplement: ppat.1006647.s005.pdf [file ppat.1006647.s005.pdf]
