# Supplementary material for: IRF-8 regulates expansion of myeloid-derived suppressor cells and Foxp3+ regulatory T cells and modulates Th2 immune responses to gastrointestinal nematode infection
Source: PubMed Central journal article supplement (PMC5638610; doi:10.1371/journal.ppat.1006647), 2017-10-02

**S6 Fig. TGF $\beta$  levels in the supernatants of MLN cells stimulated ex vivo with AWH.** TGF $\beta$  levels were determined by ELISA in the supernatants of AWH-stimulated MLN cells from *Irf8*<sup>-/-</sup> mice treated with isotype control antibody or anti-CD25 mAb as described in the Materials and Methods. Each point represents an individual mouse. Data are presented as mean  $\pm$  SEM.

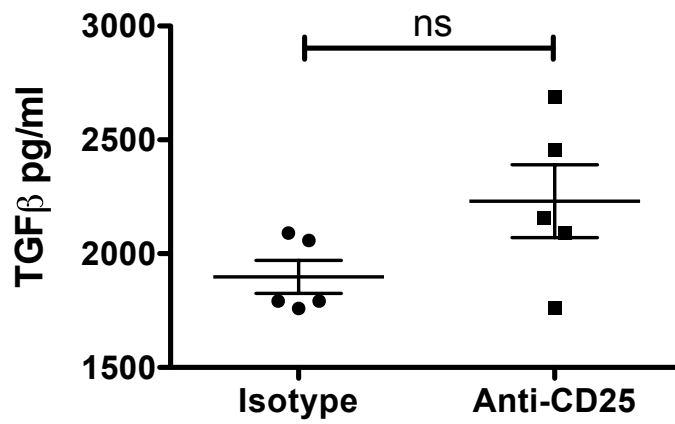

Supplement: ppat.1006647.s006.pdf [file ppat.1006647.s006.pdf]
